# Supplementary material
Source: PubMed Central journal article supplement (PMC4568214)
Supplement: pnas.1508074112.sd01.pdf [file pnas.1508074112.sd01.pdf]

Patient A

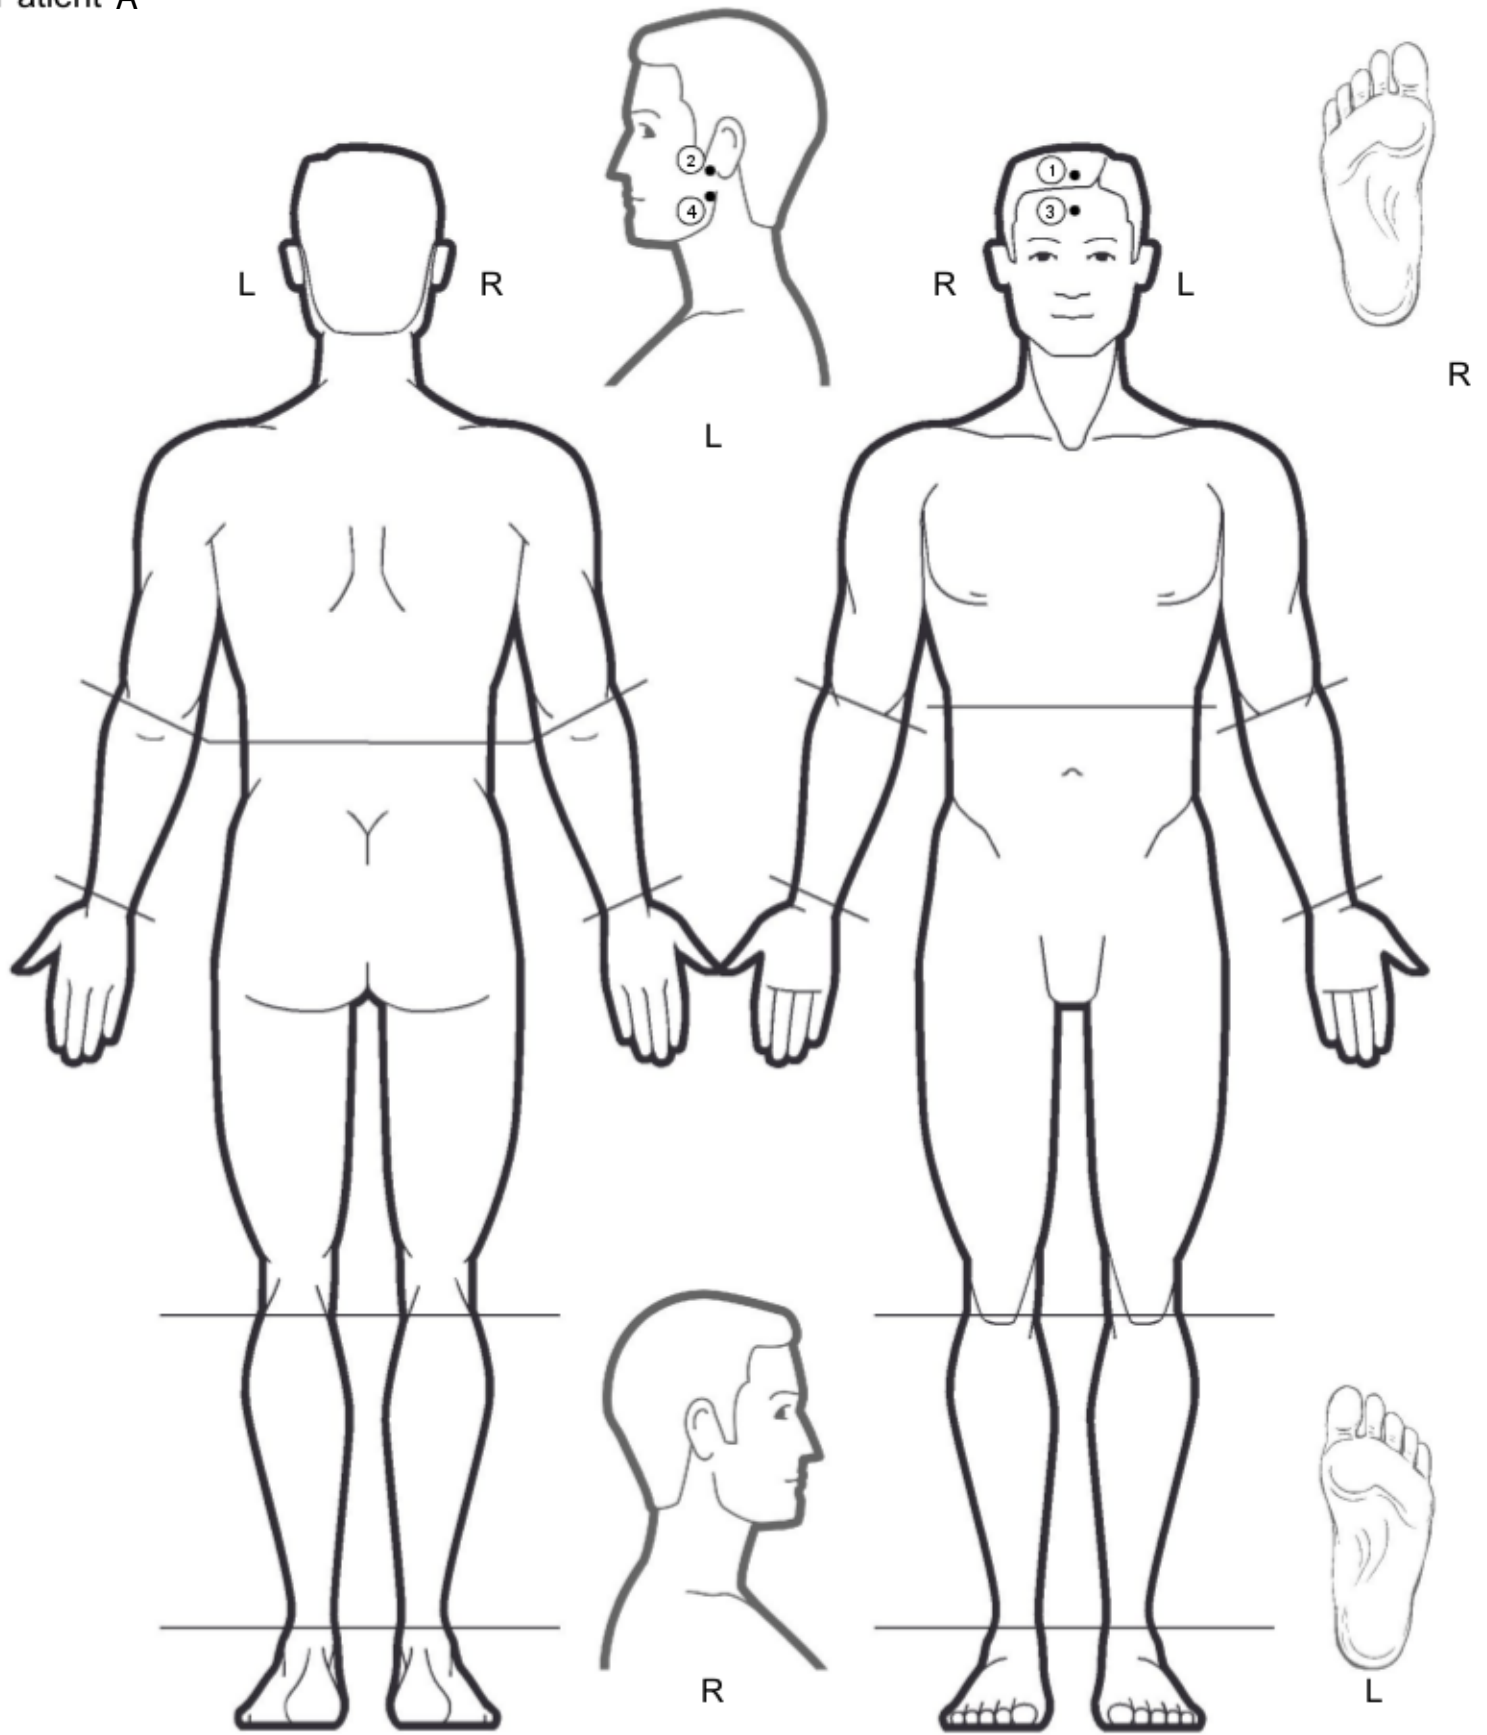

1. Primary, forehead (09/06)
2. Parotid metastasis (12/08)
3. Locoregional skin metastasis 1, forehead (02/09)
4. Locoregional skin metastasis 2, angle jaw (07/09)

Patient B

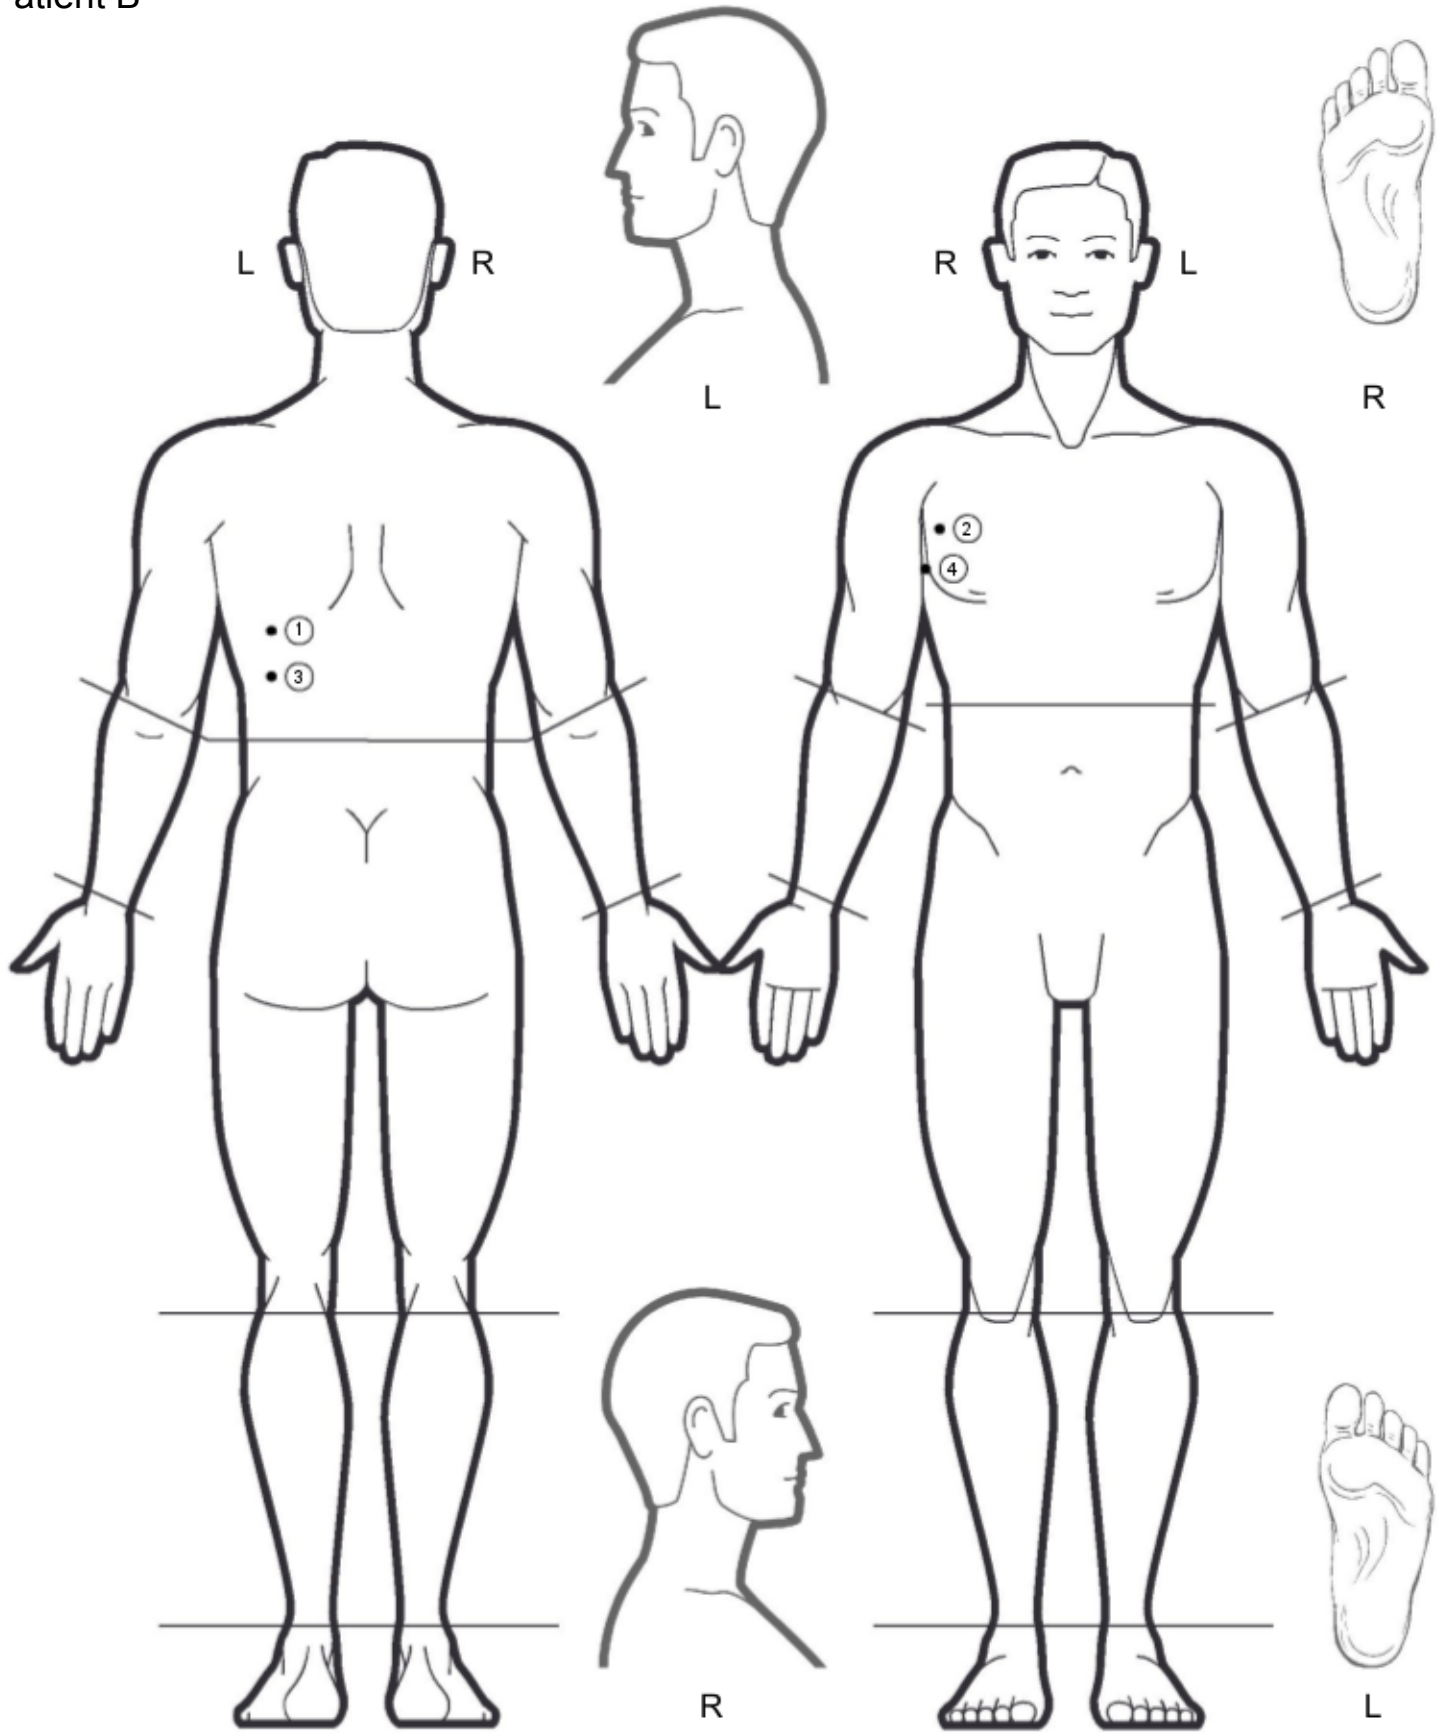

1. Primary, mid-left back (08/09)
2. Lymph node metastasis, left axilla (02/10)
3. Locoregional skin metastasis 1, left back (11/10)
4. Locoregional skin metastasis 2, left axilla (06/11)

Patient C

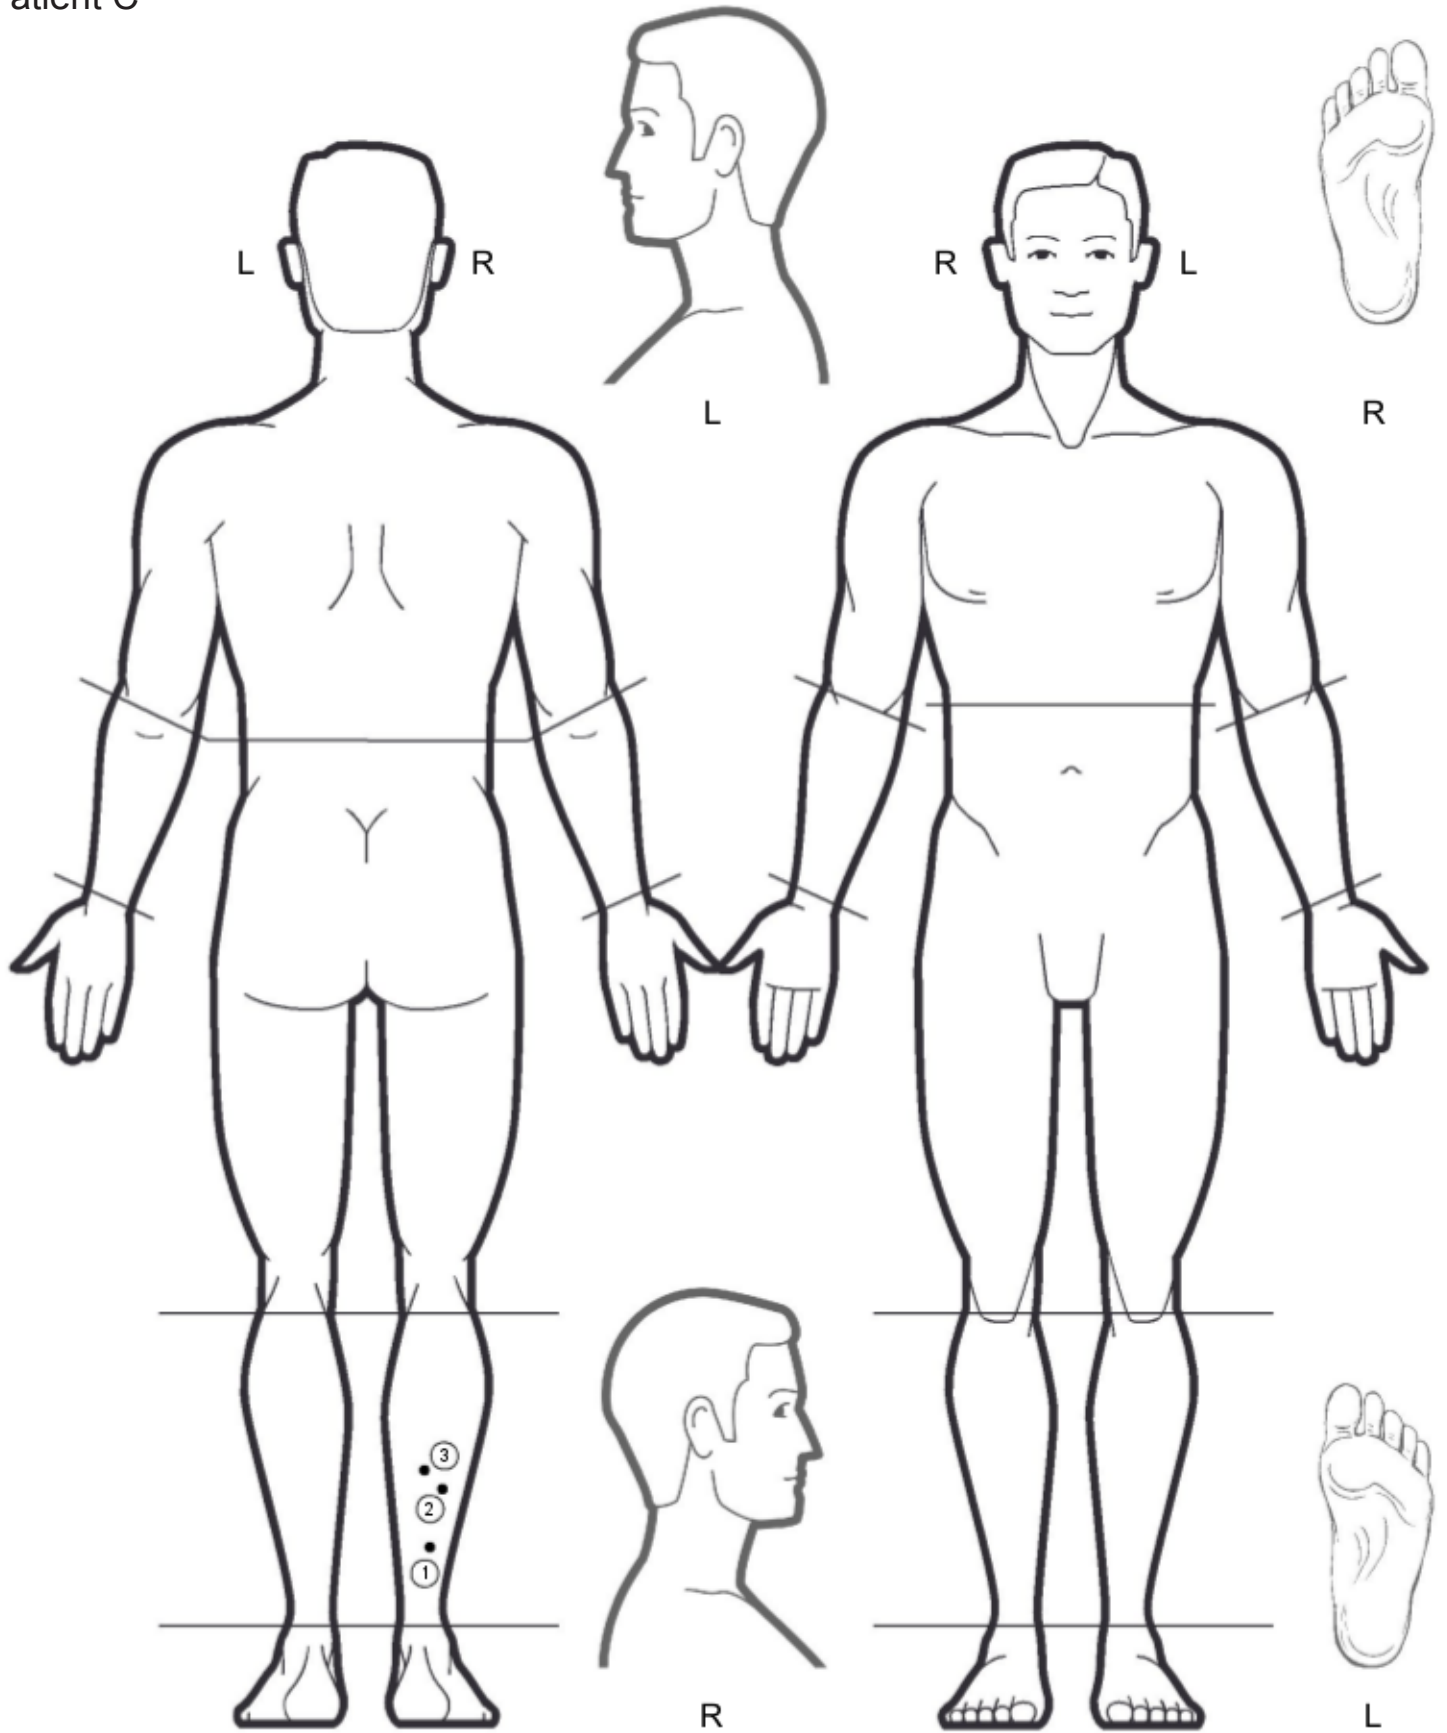

1. Primary, right lower calf (01/10)
2. Locoregional skin metastasis 1, right calf (10/10)
3. Locoregional skin metastasis 2, right mid calf (01/11)

Patient D

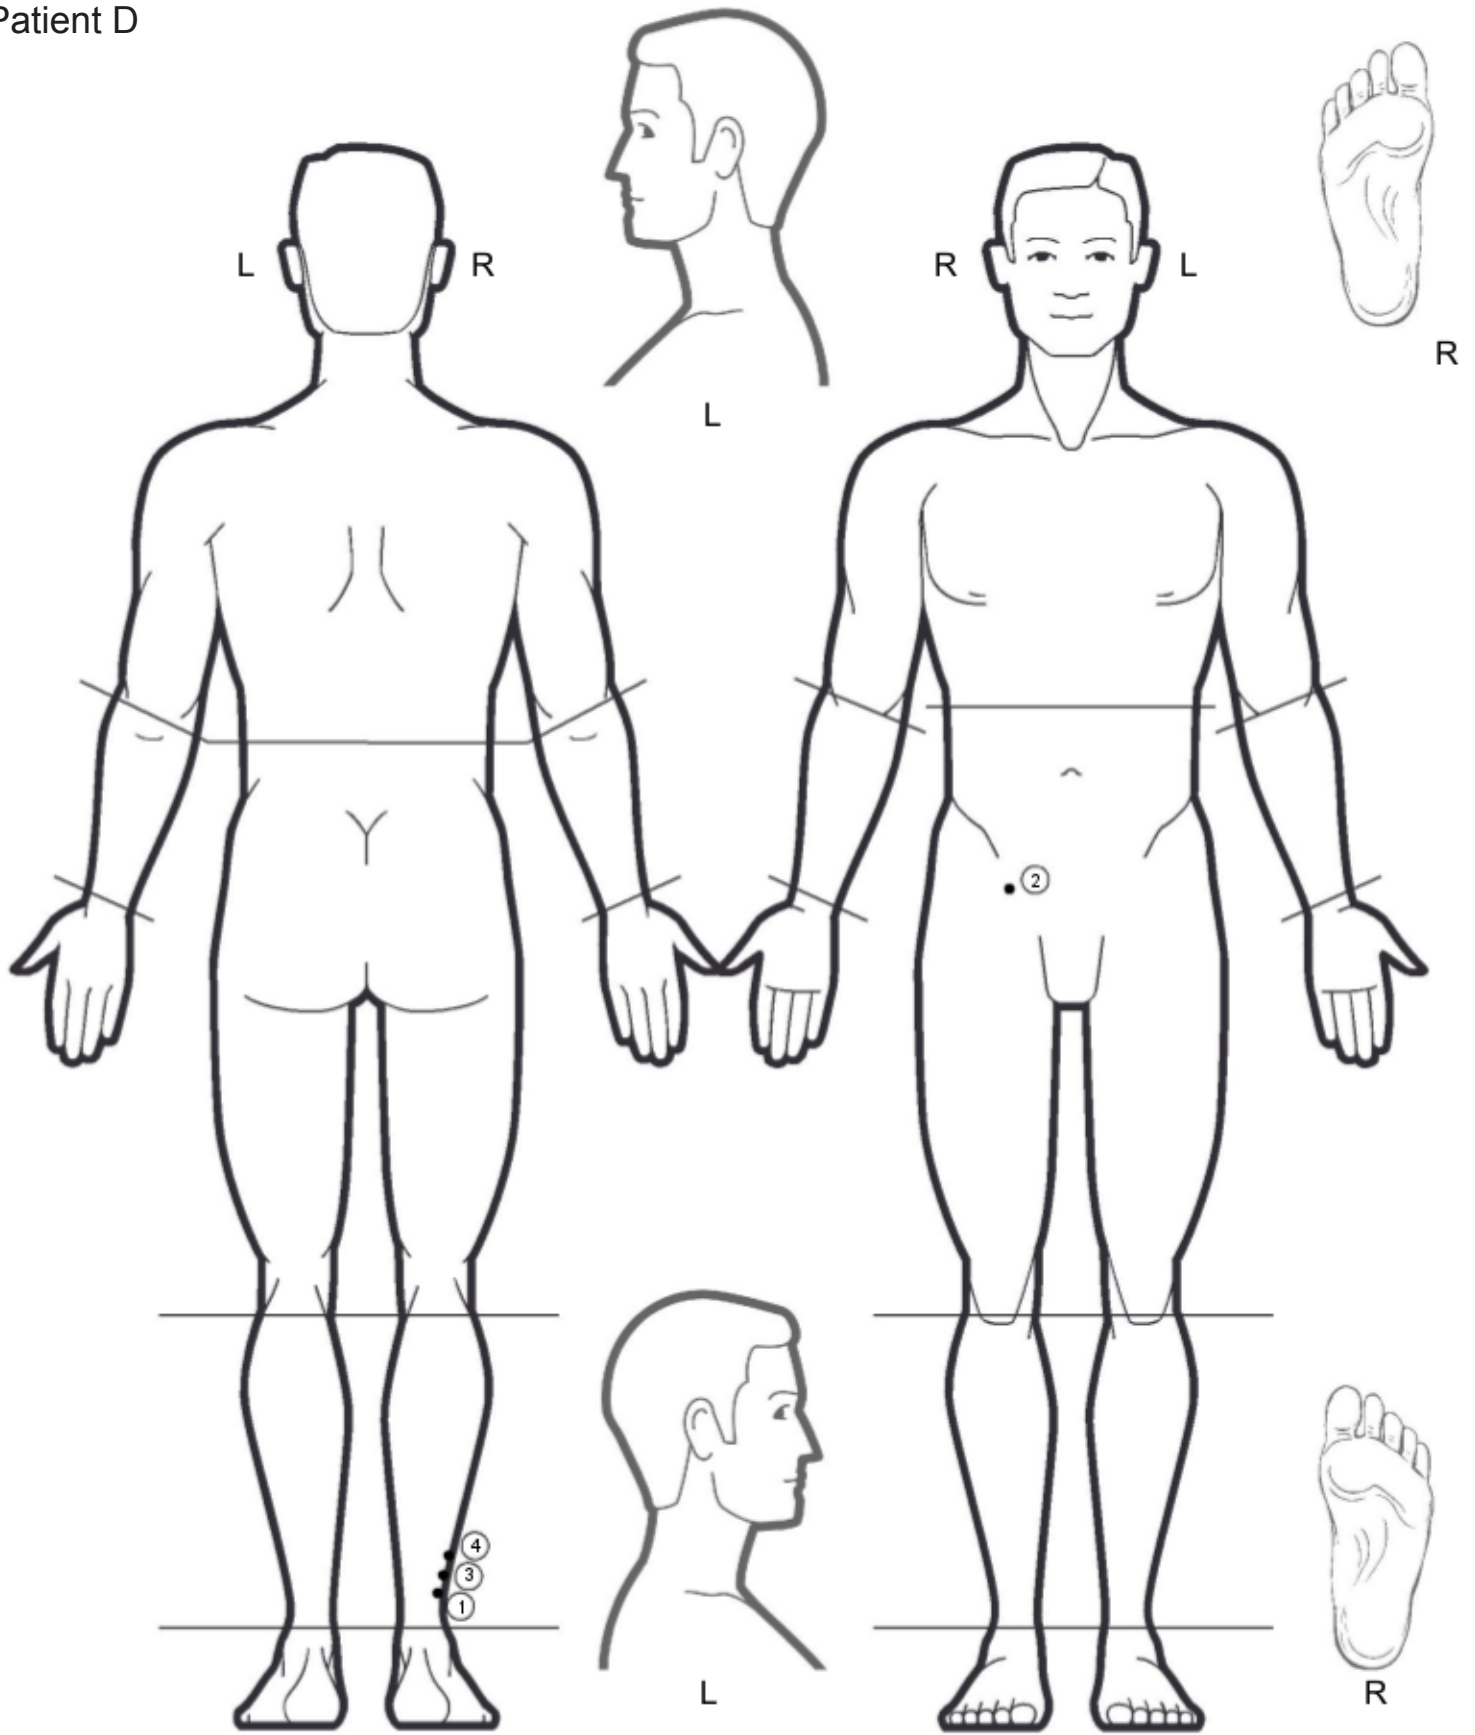

1. Primary, right ankle (07/10)
2. Lymph node metastasis, right groin (03/11)
3. Locoregional skin metastasis 1, right ankle (07/11)
4. Locoregional skin metastasis 2, right leg (07/11)

Patient E

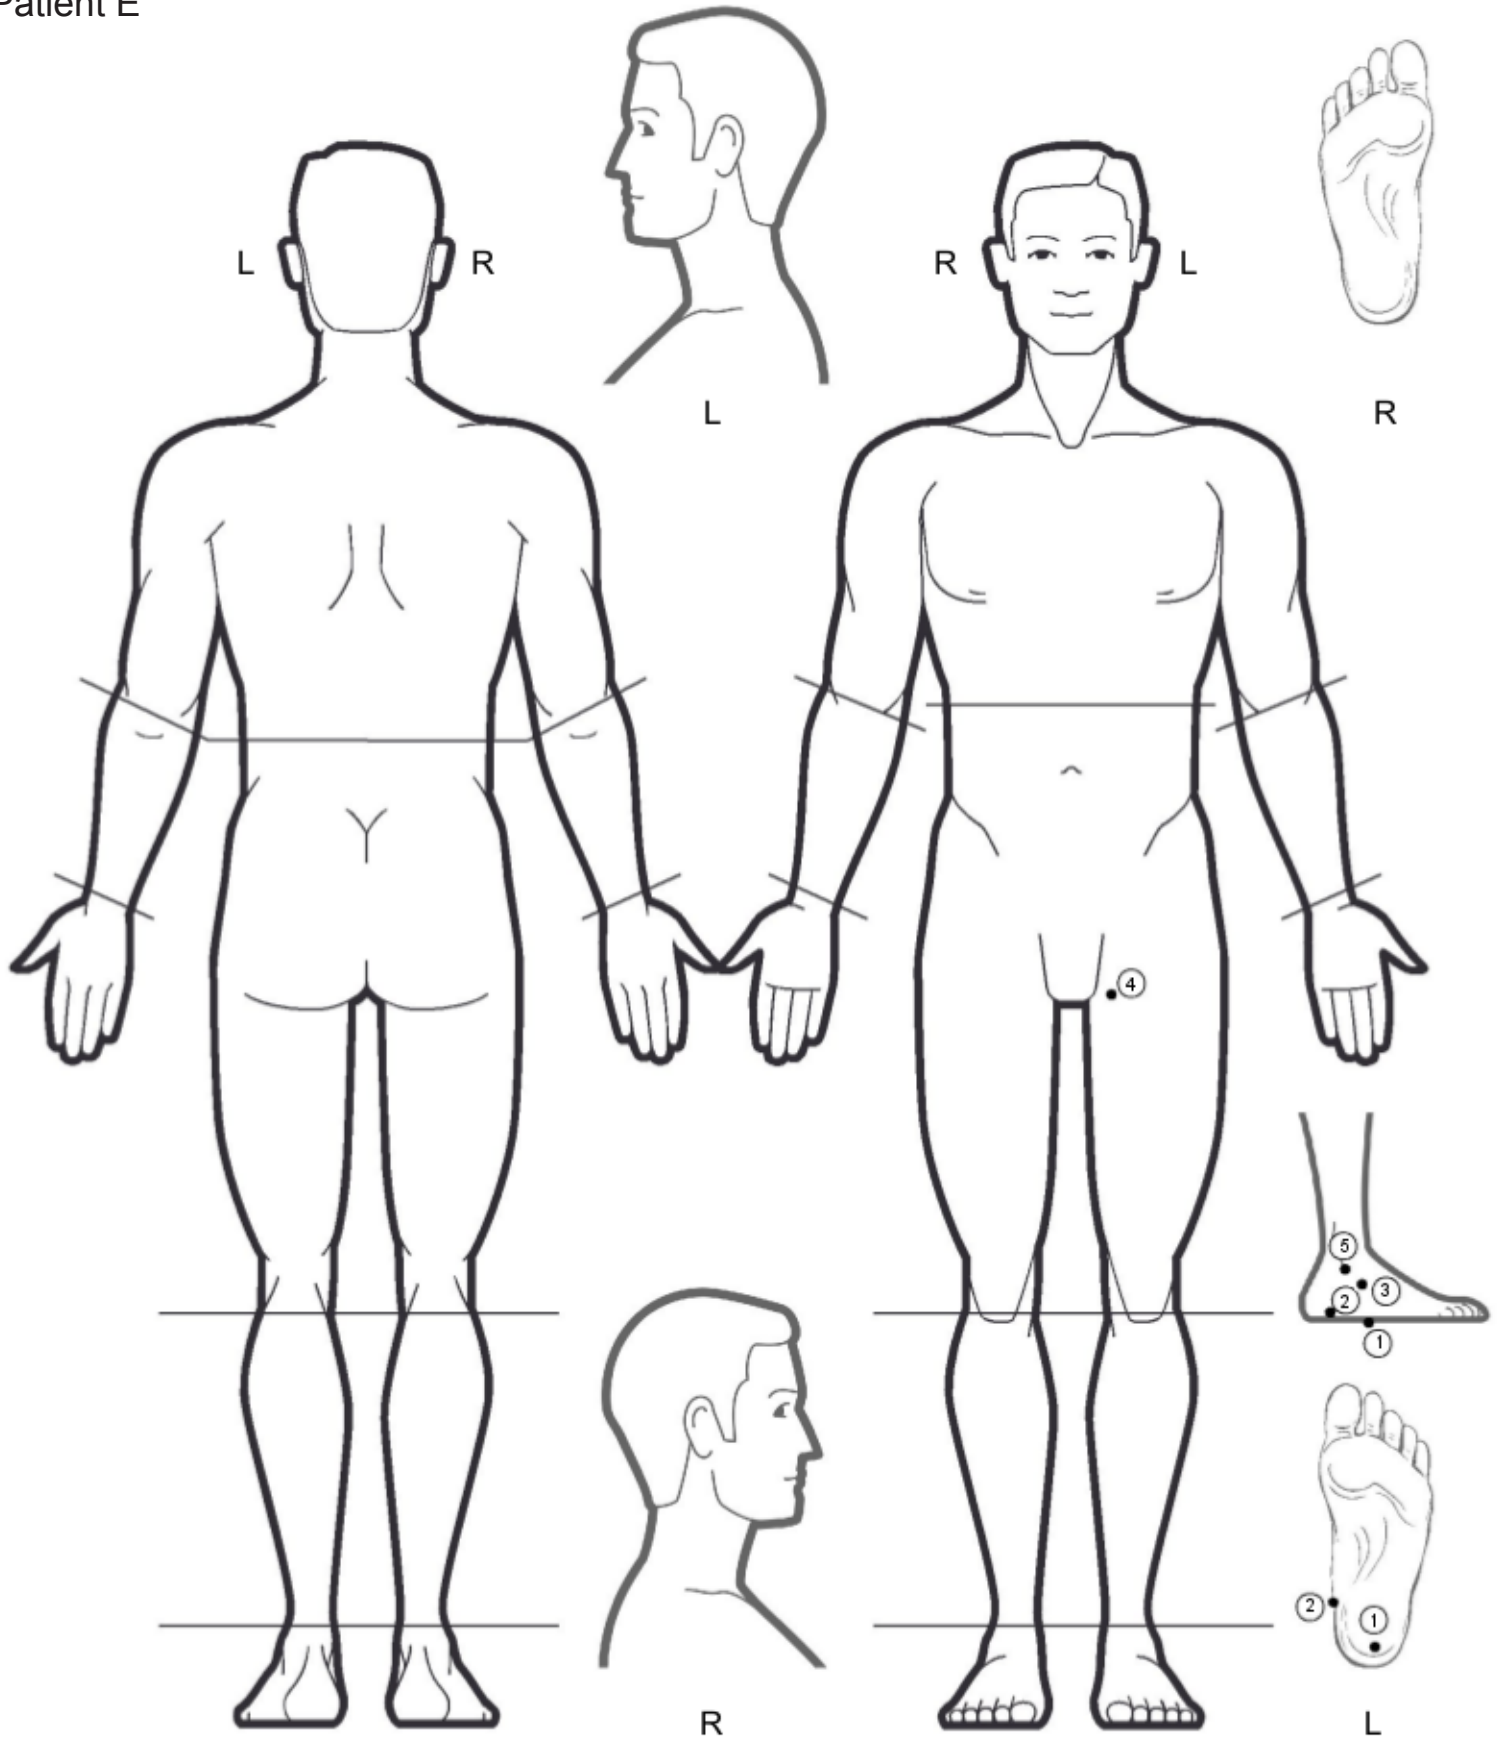

1. Primary, left heel (11/10)
2. Locoregional skin metastasis 1, left heel (06/11)
3. Locoregional skin metastasis 2, left heel (10/11)
4. Lymph node metastasis, left groin (11/11)
5. Locoregional metastasis 3, left heel (01/12)



Patient G

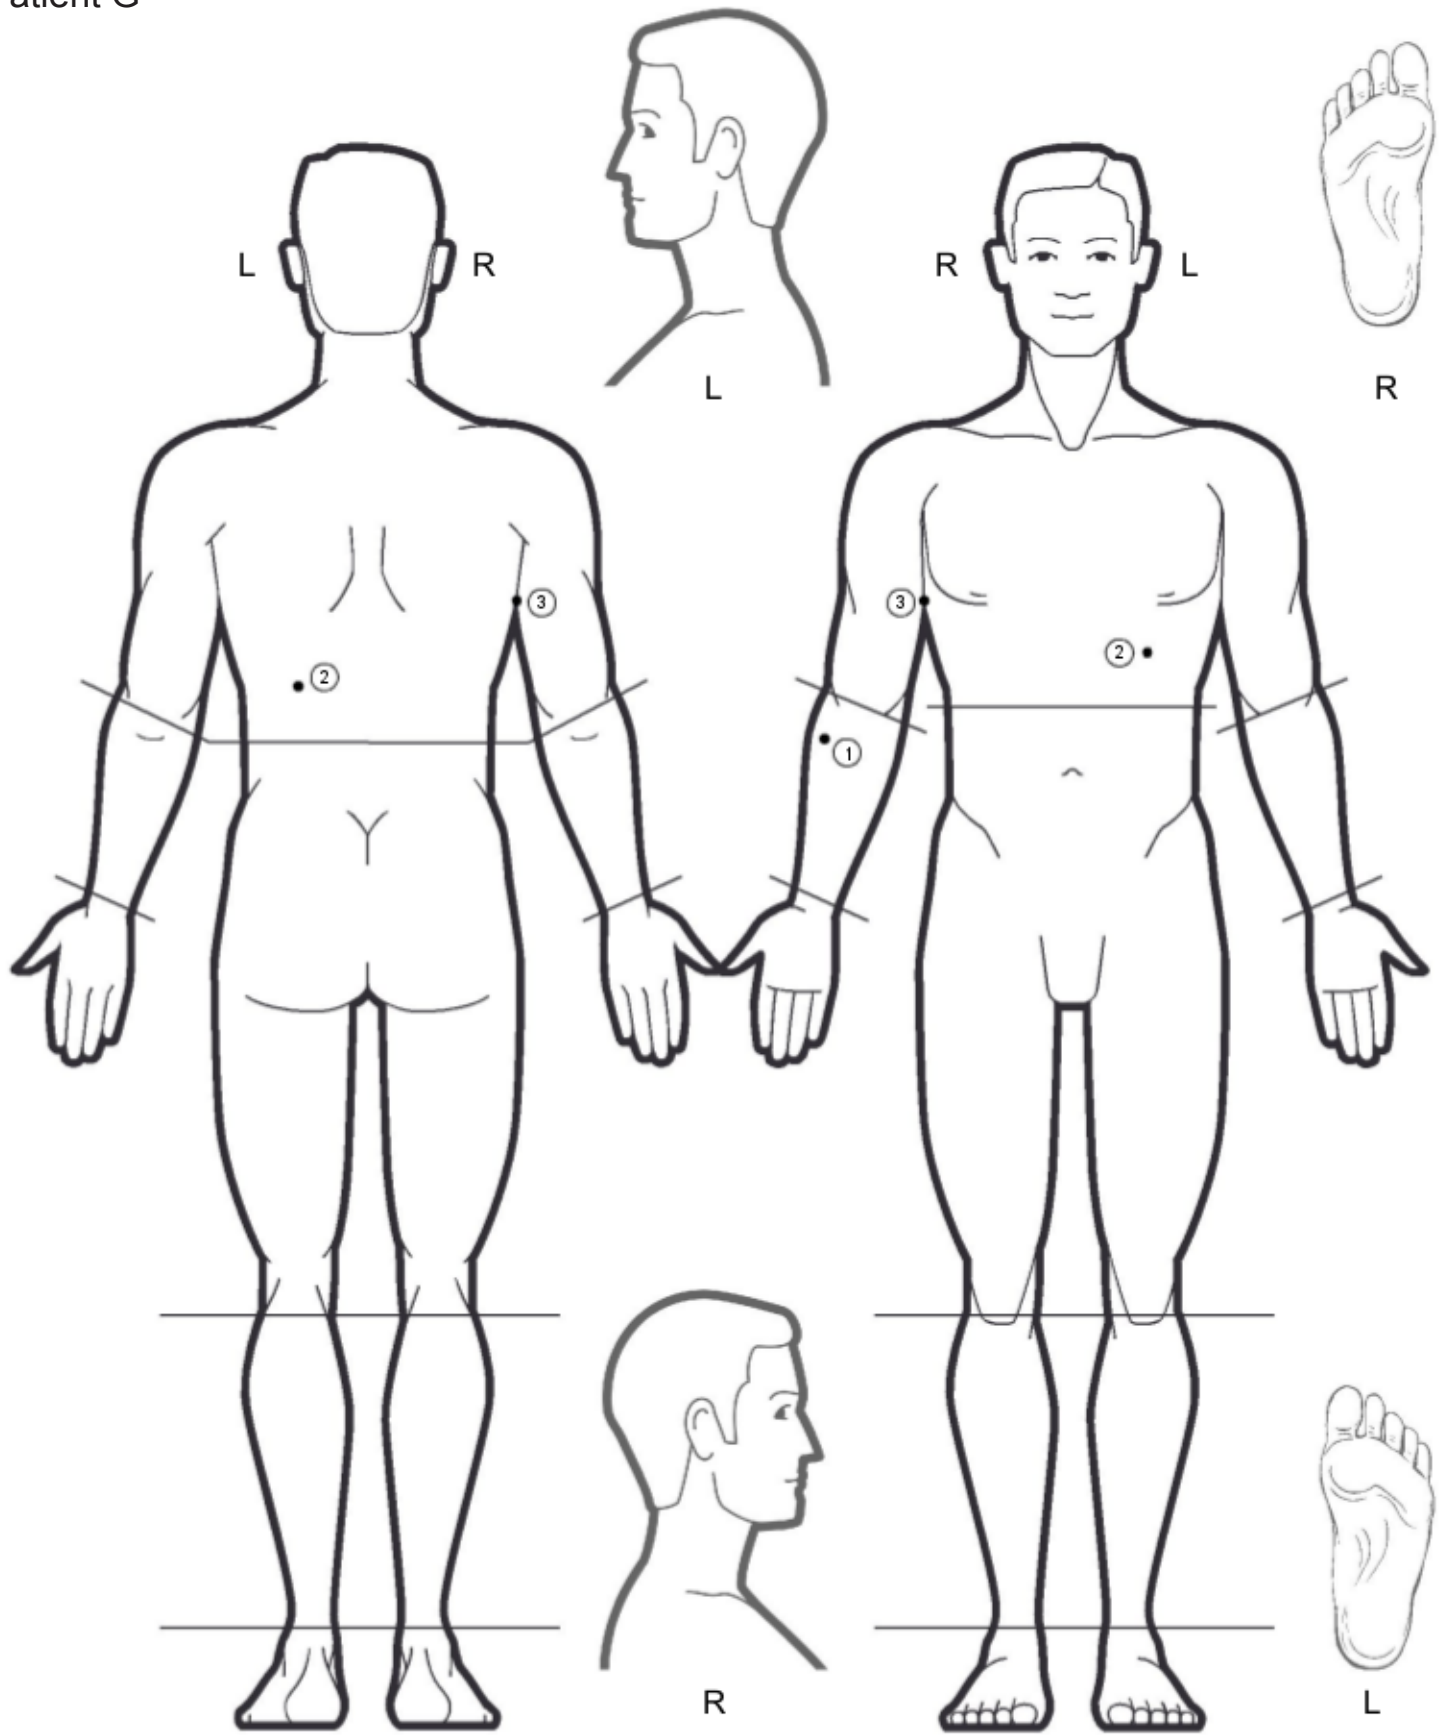

1. Primary, right forearm (10/06)
2. Lung metastasis (03/09)
3. Locoregional skin metastasis, axilla (04/10)

Patient H

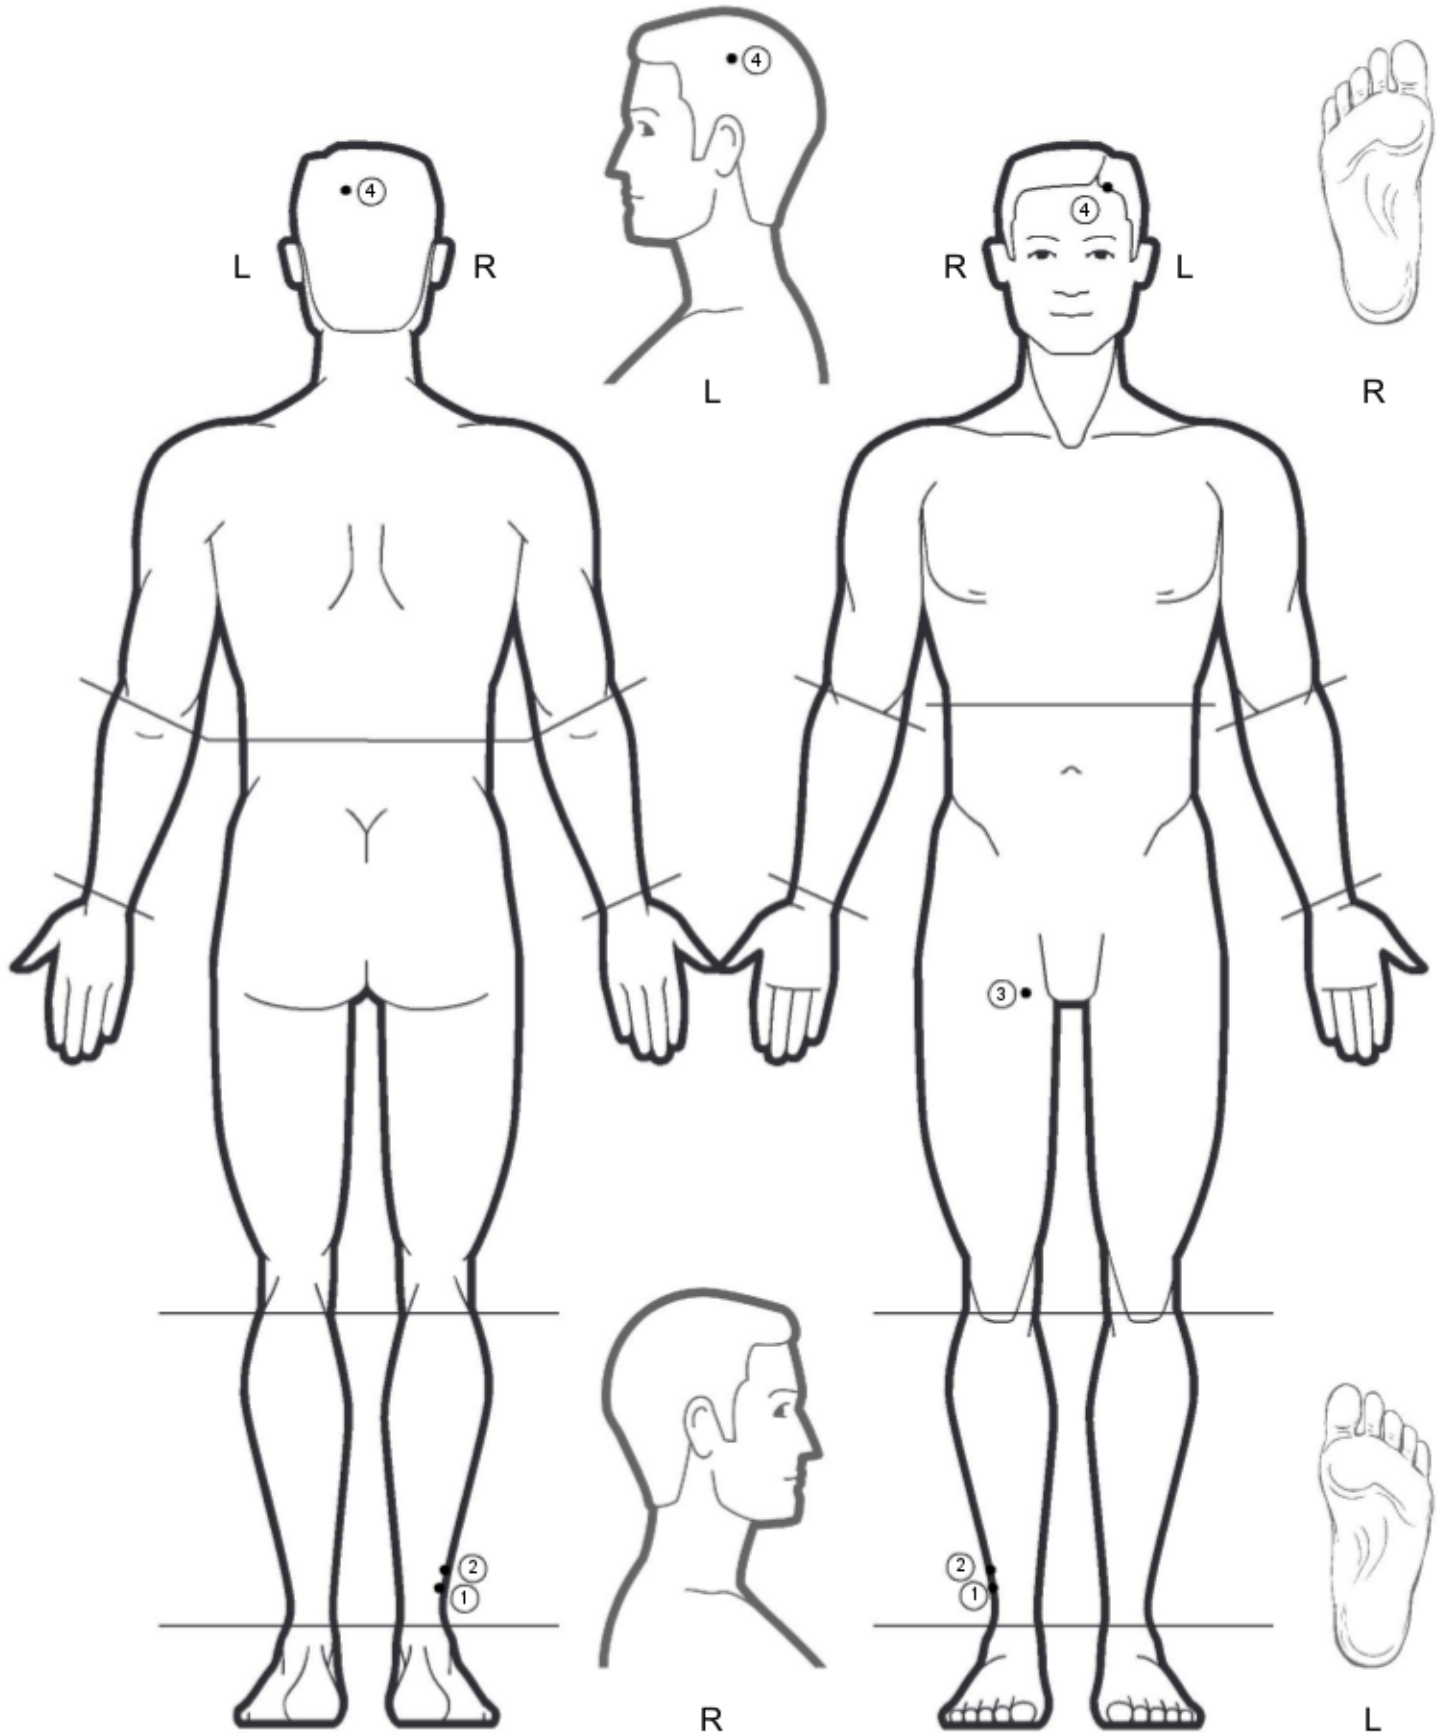

1. Primary, right leg (07/02)
2. Locoregional skin metastasis, right leg (05/04)
3. Lymph node metastasis, right inguinal node (10/04)
4. Brain metastasis (08/05)
